# Supplementary material
Source: PubMed Central journal article supplement (PMC4412845)

**Supplemental Table 1.** Summary of the stepwise building of the covariates model

| <b>Model</b>                                             | <b>OFV</b> | <b>ΔOFV</b> |
|----------------------------------------------------------|------------|-------------|
| <b>Step 1</b>                                            |            |             |
| Base                                                     | -3603.720  | N/A         |
| BW on ( $V_c$ )                                          | -3604.591  | -0.871      |
| BW on ( $V_p$ )                                          | -3605.275  | -1.555      |
| BW on ( $CL_{other}/F$ )                                 | -3604.032  | -0.312      |
| CYP2A6 on ( $CL_{other}/F$ )                             | -3611.676  | -7.956*     |
| CYP2A6 on ( $CL_{f1}/F$ )                                | -3597.866  | 5.854       |
| CYP3A5 on ( $CL_{other}/F$ )                             | -3603.720  | 0.000       |
| CYP3A5 on ( $CL_{f2}/F$ )                                | -3613.979  | -10.259*    |
| CYP3A5 on ( $CL_{m2}$ )                                  | -3606.531  | -2.811      |
| CYP2B6 on ( $CL_{other}/F$ )                             | -3607.720  | -4.000      |
| CYP2B6 on ( $CL_{f2}/F$ )                                | -3628.965  | -25.245*    |
| CYP2B6 on ( $CL_{m2}$ )                                  | -3608.275  | -4.555      |
| CYP2B6 on (INH1)                                         | -3615.040  | -11.320*    |
| CYP2B6 on (INH2)                                         | -3607.841  | -4.121      |
| <b>Step 2</b>                                            |            |             |
| Base: CYP2B6 on ( $CL_{f2}/F$ )                          | -3628.965  | N/A         |
| CYP2B6 ( $CL_{f2}/F$ ) + CYP2B6 on (INH1)                | -3628.830  | 0.135       |
| CYP2B6 + CYP3A5 on ( $CL_{f2}/F$ )                       | -3626.923  | 2.042       |
| CYP2B6 on ( $CL_{f2}/F$ ) + CYP2A6 on ( $CL_{other}/F$ ) | -3628.965  | 0.000       |

ΔOFV is the difference in the value of the objective function

\* indicates statistical significance at  $p = 0.05$

## **Supplemental Figure Legends**

**Supplemental Figure 1** Predicted versus observed plasma concentrations of a) EFV, b) 7-OH EFV, c) 8-OH EFV displaying uniform distribution of observed concentrations around the line of identity.

**Supplemental Figure 2** Visual predictive checks in the clopidogrel phase of (a) EFV, (b) 7-OH EFV, and (c) 8-OH EFV based on 1000 simulations per each CYP2B6 genotype group when clopidogrel 75 mg was administered for four days prior to EFV 200 mg. Dashed lines represent the 5<sup>th</sup> and 95<sup>th</sup> percentiles while the solid line is the median of simulated plasma concentrations.

## Supplemental Figure 1

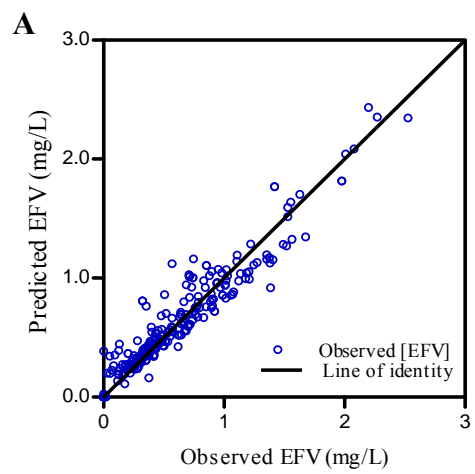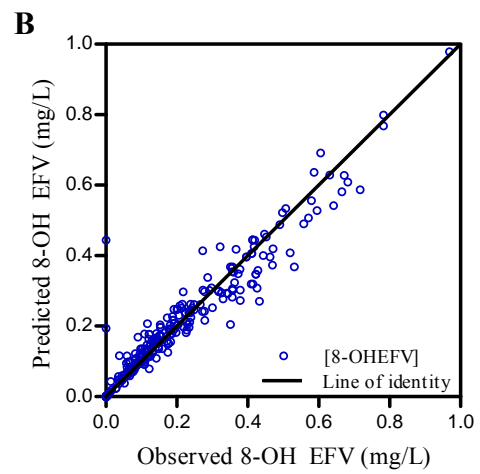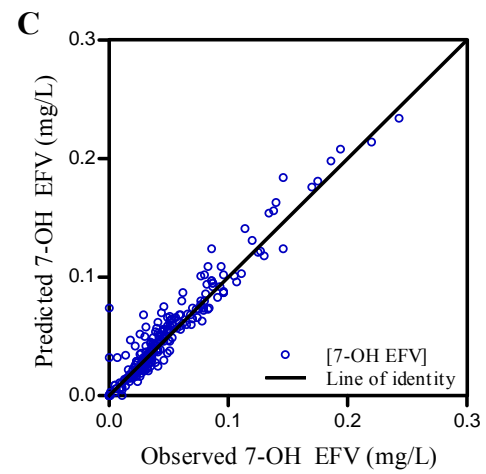

Supplemental Figure 2 (a):

A

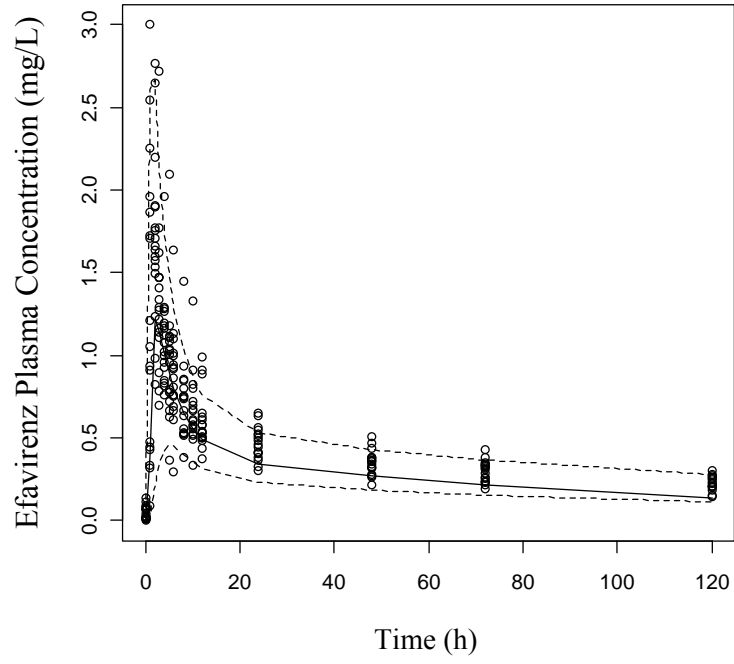

Supplemental Figure 2 (b):

**B**

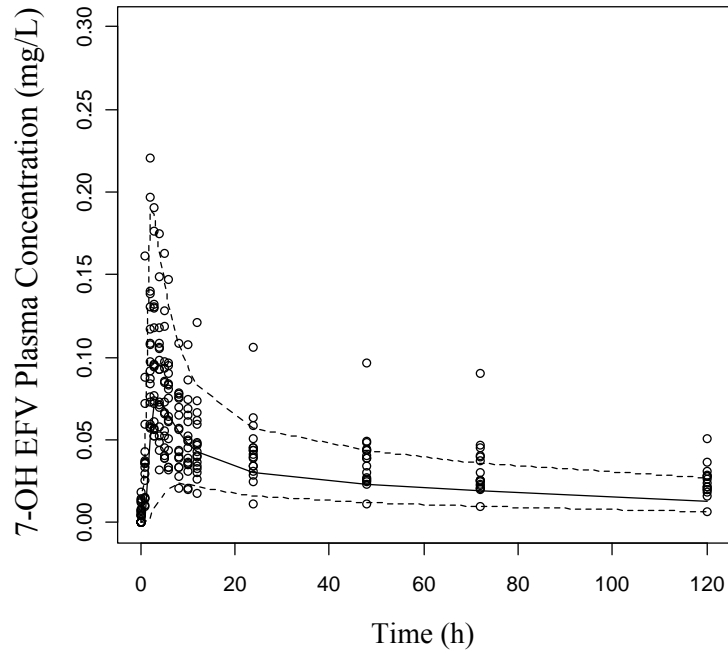

Supplemental Figure 2 (c):

C

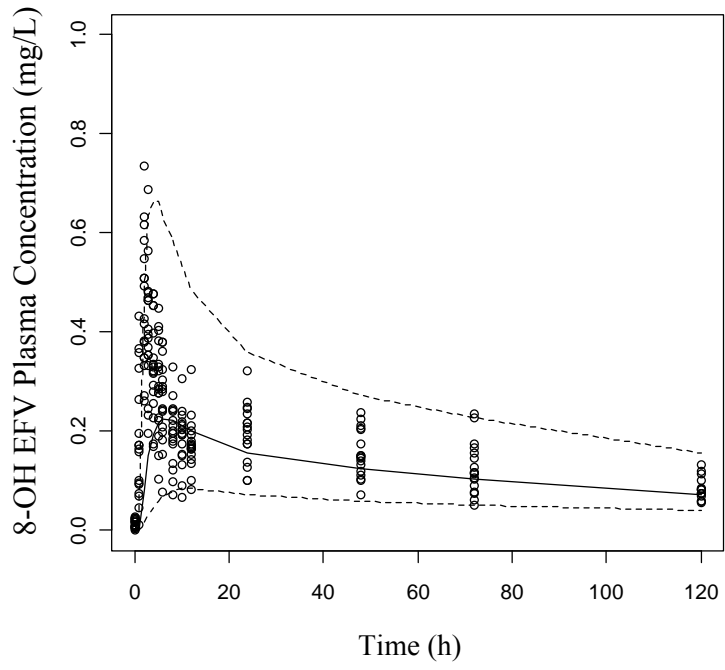

Supplement: NIHMS682695-supplement-Supp_TableS1___FigureS1-S2.pdf [file NIHMS682695-supplement-Supp_TableS1___FigureS1-S2.pdf]
